# Supplementary material for: Evolution of Youth’s Mental Health and Quality of Life during the COVID-19 Pandemic in South Tyrol, Italy: Comparison of Two Representative Surveys
Source: MDPI journal article supplement (doi:10.3390/children10050895), 2023-05-17
Supplement: s1 [file s1]

Supplementary Material

**Table S1.** Results of the stepwise linear regression models

| Item                | Report             | COP-S<br>Survey | Predictor                                       | Regression Coefficient<br>Beta | Confidence<br>Interval | p-<br>value |
|---------------------|--------------------|-----------------|-------------------------------------------------|--------------------------------|------------------------|-------------|
| HRQoL <sup>1</sup>  | Proxy-<br>reported | 2021            | older age                                       | -0.334                         | [-0.431;-0.237]        | < 0.001     |
|                     |                    |                 | single parenthood                               | -1.286                         | [-2.503;0.069]         | 0.038       |
|                     |                    |                 | elevated parental burden due to the<br>pandemic | -1.597                         | [-2.281;-0.913]        | < 0.001     |
|                     |                    |                 | low family climate                              | -7.680                         | [-8.398;-6.962]        | < 0.001     |
|                     |                    |                 | elevated burden of school                       | -4.439                         | [-5.144;-3.734]        | < 0.001     |
|                     |                    |                 | extended use of digital media                   | -2.919                         | [-3.684;-2.154]        | < 0.001     |
|                     |                    |                 | less contact with friends                       | -3.234                         | [-4.028;-2.440]        | < 0.001     |
|                     |                    | 2022            | older age                                       | -0.370                         | [-0.454;-0.286]        | < 0.001     |
|                     |                    |                 | single parenthood                               | -1.142                         | [-2.201;-0.083]        | 0.035       |
|                     |                    |                 | elevated parental burden due to the<br>pandemic | -1.068                         | [-1.682;-0.454]        | = 0.001     |
|                     |                    |                 | low family climate                              | -6.899                         | [-7.581;-6.218]        | < 0.001     |
|                     |                    |                 | elevated burden of school                       | -4.281                         | [-4.895;-3.668]        | < 0.001     |
|                     |                    |                 | extended use of digital media                   | -2.672                         | [-3.300;-2.045]        | < 0.001     |
|                     |                    |                 | less contact with friends                       | -3.060                         | [-3.672;-2.448]        | < 0.001     |
|                     | Self-reported      | 2021            | Female gender x older age                       | -0.175                         | [-0.238;-0.113]        | < 0.001     |
|                     |                    |                 | Migration background                            | -1.761                         | [-3.244;-0.278]        | 0.020       |
|                     |                    |                 | elevated parental burden due to the<br>pandemic | -1.680                         | [-2.641;-0.720]        | 0.001       |
|                     |                    |                 | low family climate                              | -7.369                         | [-8.443;-6.295]        | < 0.001     |
|                     |                    |                 | elevated burden of school                       | -3.730                         | [-4.743;-2.717]        | < 0.001     |
|                     |                    |                 | extended use of digital media                   | -1.716                         | [-2.744;-0.689]        | 0.001       |
|                     |                    |                 | Less contact with friends                       | -4.376                         | [-5.359;-3.393]        | < 0.001     |
|                     |                    |                 | gender x age                                    | -0.120                         | [-0.179;-0.062]        | < 0.001     |
|                     |                    |                 | good family climate                             | -6.874                         | [-8.006;-5.741]        | < 0.001     |
|                     |                    |                 | no elevated burden of school                    | -4.472                         | [-5.368;-3.577]        | < 0.001     |
|                     |                    |                 | good contact with friends                       | -3.833                         | [-4.748;-2.919]        | < 0.001     |
| Symptoms of anxiety | self-reported      | 2021            | older age x female gender                       | 0.148                          | [0.120;0.177]          | < 0.001     |

|                                              |                                              |                                              |                                              |                 |               |         |
|----------------------------------------------|----------------------------------------------|----------------------------------------------|----------------------------------------------|-----------------|---------------|---------|
| Depressive symptoms                          | self-reported                                | 2022                                         | elevated parental burden due to the pandemic | 0.728           | [0.299;1.156] | 0.001   |
|                                              |                                              |                                              | lower family climate                         | 2.240           | [1.761;2.720] | < 0.001 |
|                                              |                                              |                                              | elevated burden of school                    | 1.056           | [0.605;1.507] | < 0.001 |
|                                              |                                              |                                              | less contact with friends                    | 0.988           | [0.557;1.420] | < 0.001 |
|                                              |                                              |                                              | older age x female gender                    | 0.117           | [0.091;0.143] | < 0.001 |
|                                              |                                              | elevated parental burden due to the pandemic | 0.630                                        | [0.222;1.039]   | 0.003         |         |
|                                              |                                              | lower family climate                         | 2.611                                        | [2.100;3.121]   | < 0.001       |         |
|                                              |                                              | elevated burden of school                    | 1.210                                        | [0.805;1.616]   | < 0.001       |         |
|                                              |                                              | less contact with friends                    | 0.962                                        | [0.550;1.374]   | < 0.001       |         |
|                                              |                                              | 2021                                         | older age                                    | 0.092           | [0.065;0.119] | < 0.001 |
|                                              | older age x female gender                    |                                              | 0.027                                        | [0.019;0.036]   | < 0.001       |         |
|                                              | elevated parental burden due to the pandemic |                                              | 0.150                                        | [0.021;0.279]   | 0.023         |         |
|                                              | lower family climate                         |                                              | 0.992                                        | [0.847;1.137]   | < 0.001       |         |
|                                              | elevated burden of school                    |                                              | 0.267                                        | [0.132;0.402]   | < 0.001       |         |
|                                              | proxy-reported                               | 2022                                         | less contact with friends                    | 0.273           | [0.143;0.403] | < 0.001 |
|                                              |                                              |                                              | older age                                    | 0.090           | [0.064;0.115] | < 0.001 |
|                                              |                                              |                                              | older age x female gender                    | 0.018           | [0.010;0.026] | < 0.001 |
|                                              |                                              |                                              | lower family climate                         | 0.928           | [0.773;1.082] | < 0.001 |
|                                              |                                              |                                              | elevated burden of school                    | 0.358           | [0.235;0.480] | < 0.001 |
|                                              |                                              | 2021                                         | less contact with friends                    | 0.385           | [0.260;0.509] | < 0.001 |
| olderer age                                  |                                              |                                              | -0.178                                       | [-0.265;-0.091] | < 0.001       |         |
| older age x female gender                    |                                              |                                              | -0.068                                       | [-0.096;-0.040] | < 0.001       |         |
| single parenthood                            |                                              |                                              | -1.114                                       | [-2.098;-0.130] | 0.027         |         |
| elevated parental burden due to the pandemic |                                              |                                              | -1.084                                       | [-1.506;-0.662] | < 0.001       |         |
| self-reported                                | 2022                                         | low family climate                           | -3.076                                       | [-3.547;-2.605] | < 0.001       |         |
|                                              |                                              | elevated burden of school                    | -1.030                                       | [-1.465;-0.595] | < 0.001       |         |
|                                              |                                              | older age x female gender                    | -0.061                                       | [-0.086;-0.035] | < 0.001       |         |
|                                              |                                              | Single parenthood                            | -1.372                                       | [-2.236;-0.508] | 0.002         |         |
|                                              |                                              | Migration background                         | -0.780                                       | [-1.430;-0.131] | 0.019         |         |
|                                              | 2021                                         | elevated parental burden due to the pandemic | -0.613                                       | [-1.010;-0.215] | 0.003         |         |
|                                              |                                              | low family climate                           | -2.508                                       | [-3.009;-2.006] | < 0.001       |         |
|                                              |                                              | Less contact with friends                    | -0.893                                       | [-1.292;-0.493] | < 0.001       |         |
|                                              |                                              | elevated burden of school                    | -1.231                                       | [-1.623;-0.840] | < 0.001       |         |
|                                              |                                              | older age                                    | -0.263                                       | [-0.371;-0.154] | < 0.001       |         |

|                           |      |                                                 |        |                 |         |
|---------------------------|------|-------------------------------------------------|--------|-----------------|---------|
| Psychosomatic<br>symptoms |      | older age x female gender                       | -0.141 | [-0.176;-0.106] | < 0.001 |
|                           |      | single parenthood                               | -1.352 | [-2,277;-0.428] | < 0.001 |
|                           |      | elevated parental burden due to the<br>pandemic | 0.788  | [-1.315;-0.261] | < 0.001 |
|                           |      | low family climate                              | -3.461 | [-4.050;-2.873] | < 0.001 |
|                           |      | elevated burden of school                       | -0.919 | [-1.462;-0.377] | < 0.001 |
|                           | 2022 | older age x female gender                       | -0.355 | [-0.496;-0.215] | < 0.001 |
|                           |      | female gender                                   | 3.520  | [1.447;5.594]   | < 0.001 |
|                           |      | low family climate                              | -3.704 | [-4.309;-3.099] | < 0.001 |
|                           |      | elevated burden of school                       | -1.506 | [-1.985;-1.027] | < 0.001 |

<sup>1</sup> HRQoL, health-related quality of life.
